# Supplementary material
Source: ML conference proceedings conference paper supplement (https://proceedings.neurips.cc/paper_files/paper/2023/hash/8393d955a00c463a982cefe77d0404e1-Abstract.html)
Supplement: Supplementary file 1 [file 8393d955a00c463a982cefe77d0404e1-Supplemental-Conference.pdf]

---

# Slimmed Asymmetrical Contrastive Learning and Cross Distillation for Lightweight Model Training

---

## 1 Supplementary Material

### 1.1 Algorithm

---

**Algorithm 1:** PyTorch-style pseudocode for the proposed algorithm

---

```
# f:  encoder model
# h:  projector head
# s:  slim ratio of SACL
# slicer:  SACL slicer
# alpha:  weight between CL loss and CD loss
# lambda:  weight on the off-diagonal terms
def normalize(z):
    z_norm = (z - z.mean(dim=0)) / z.std(dim=0)
    return z_norm

for batch in trainloader:
    x_a, x_b = batch

    # SACL forward pass
    slicer.remove_mask()
    z1 = h(f(x_a))
    slicer.activate_mask()
    z2 = h(f(x_b))

    # reverse the order of input
    with torch.no_grad():
        slicer.remove_mask()
        z1t = h(f(x_b))
        slicer.activate_mask()
        z2t = h(f(x_a))

    # cross correlation
    cab = mm(normalize(z1).T, normalize(z2)) / N
    caat = mm(normalize(z1).T, normalize(z1t)) / N
    cbbt = mm(normalize(z2).T, normalize(z2t)) / N

    # Contrastive learning loss
    cl_loss = bt_loss(cab)

    # CD loss
    dcorr_a = off_diagonal(caat).mul_(lambda).sum()
    dcorr_b = off_diagonal(cbbt).mul_(lambda).sum()
    cd_loss = (dcorr_a + dcorr_b) / 2

    loss = cl_loss.mul(alpha) + cd_loss.mul(1-alpha)
    loss.backward()
    optimizer.step()
```

---

## 1.2 Compared to the Log-based distillation loss

From the perspective of knowledge distillation, the negative logarithm-based distillation loss has been widely incorporated into the “teacher-student” learning. In Section 3.2, we proposed the cross-distillation (XD) learning scheme. The distillation objective in Eq (10) is the inner decorrelation minimization between embeddings  $z$  and  $[\tilde{z}]$ . In addition to the correlation-based distillation loss, we also investigate the negative logarithm (e.g.,  $-a \log b$ ) distillation loss that is employed in both supervised knowledge distillation [3] and contrastive learning [1].

To avoid the unbalanced loss magnitude, the distillation loss is introduced as the regularization term controlled by the penalty level  $\gamma$ :

$$\mathcal{L} = \mathcal{L}_{\text{SACL}}(z_A, z_B) + \gamma \mathcal{L}_{CD} \quad (1)$$

$$\mathcal{L}_{CD} = (-[\tilde{z}_A] \log z_A + -[\tilde{z}_B] \log z_B)/2 \quad (2)$$

We empirically observe that the negative logarithm-based distillation loss failed to outperform the proposed cross-distillation loss  $\mathcal{L}_{CD}$  with inner-decorrelation minimization. As shown in the ImageNet-100 results below:

| Method               | Encoder           | # of Params (M) | Linear Eval Acc. (%) |
|----------------------|-------------------|-----------------|----------------------|
| <b>XD</b>            | MobileNet-V1 (1×) | 3.2             | <b>80.30</b>         |
| XD (w/ negative log) | MobileNet-V1 (1×) | 3.2             | 79.63*               |
| Barlow Twins [5]     | MobileNet-V1 (1×) | 3.2             | 78.40                |

\*: Best accuracy we found with  $\gamma = 1\text{e-}3$ .

Although the negative-logarithm distillation loss is suboptimal compared to the inner decorrelation minimization, the proposed cross-distillation learning scheme is beneficial to lightweight contrastive learning, compared to the baseline [5].

## 1.3 Detailed Experimental Setup of Pre-training

**ImageNet-1K** The encoders (MobileNet, EfficientNet, ResNet-50) are trained on ImageNet-1K with 100/200/300 epochs from scratch with the proposed method. We set the batch to 256 with a learning rate = 0.8. We employ the LARS optimizer with weight decay set to  $1.5\text{e-}6$ . We set the correlation weights  $\lambda$  to 0.005. The hidden layer dimension of the projector is 4096. The detailed data augmentation is summarized in Table 1

Table 1: Detailed image augmentation settings on ImageNet-1K.

| Parameter                         | $X_A$            | $X_B$            |
|-----------------------------------|------------------|------------------|
| Random crop size                  | $224 \times 224$ | $224 \times 224$ |
| Horizontal flip probability       | 0.5              | 0.5              |
| Color jitter probability          | 0.8              | 0.8              |
| Brightness adjustment probability | 0.4              | 0.4              |
| Contrast adjustment probability   | 0.4              | 0.4              |
| Saturation adjustment probability | 0.2              | 0.2              |
| Hue adjustment probability        | 0.1              | 0.1              |
| Gaussian blurring probability     | 1.0              | 0.1              |
| Solarization probability          | 0.0              | 0.2              |

**ImageNet-100** With the proposed cross-distillation method, we train the lightweight ViT model on the ImageNet-100 dataset for 400 epochs. The batch size is set to 256 with AdamW optimizer. The learning rate and weight decay are set to 0.005 and  $1\text{e-}4$ . The detailed data augmentation is summarized in Table 2:

Table 2: Detailed image augmentation settings on ImageNet-100.

| Parameter                         | $X_A$            | $X_B$            |
|-----------------------------------|------------------|------------------|
| Random crop size                  | $224 \times 224$ | $224 \times 224$ |
| Horizontal flip probability       | 0.5              | 0.5              |
| Color jitter probability          | 0.8              | 0.8              |
| Brightness adjustment probability | 0.4              | 0.4              |
| Contrast adjustment probability   | 0.4              | 0.4              |
| Saturation adjustment probability | 0.0              | 0.2              |
| Hue adjustment probability        | 0.1              | 0.1              |
| Gaussian blurring probability     | 1.0              | 0.1              |
| Solarization probability          | 0.0              | 0.2              |

**CIFAR-10** The proposed method is trained from scratch by 1,000 epochs with LARS-SGD optimizer [4]. We use 256 batch size along with 0.3 learning rate and  $1e - 4$  weight decay. The Cosine learning rate scheduler is used with 10 epochs of warmup training. The detailed data augmentation is summarized in Table 3.

Table 3: Detailed image augmentation settings on CIFAR-10.

| Parameter                         | $X_A$          | $X_B$          |
|-----------------------------------|----------------|----------------|
| Random crop size                  | $32 \times 32$ | $32 \times 32$ |
| Horizontal flip probability       | 0.5            | 0.5            |
| Color jitter probability          | 0.8            | 0.8            |
| Brightness adjustment probability | 0.4            | 0.4            |
| Contrast adjustment probability   | 0.4            | 0.4            |
| Saturation adjustment probability | 0.2            | 0.2            |
| Hue adjustment probability        | 0.1            | 0.1            |
| Gaussian blurring probability     | 0.0            | 0.0            |
| Solarization probability          | 0.0            | 0.2            |

#### 1.4 Detailed Experimental Setup of Downstream Fine-tuning

We evaluate the transferability of the pre-trained lightweight model on downstream tasks, including CIFAR-10, CIFAR-100, and VOC2007. Following the settings in [2], we fine-tuned the models for 10,000 steps with SGD and batch size of 64. The learning rate is set to 0.1 with no weight decay. The input samples are resized to  $224 \times 224$  to maintain the dimensionality as the pre-trained model. The checkpoint of the pre-trained lightweight model will be released soon.

#### References

- [1] Mathilde Caron, Hugo Touvron, Ishan Misra, Hervé Jégou, Julien Mairal, Piotr Bojanowski, and Armand Joulin. Emerging properties in self-supervised vision transformers. In *Proceedings of the IEEE/CVF international conference on computer vision (ICCV)*, 2021.
- [2] Linus Ericsson, Henry Gouk, and Timothy M Hospedales. How well do self-supervised models transfer? In *Proceedings of the IEEE/CVF Conference on Computer Vision and Pattern Recognition (CVPR)*, 2021.

- [3] Geoffrey Hinton, Oriol Vinyals, and Jeff Dean. Distilling the knowledge in a neural network. *arXiv preprint arXiv:1503.02531*, 2015.
- [4] Yang You, Igor Gitman, and Boris Ginsburg. Large Batch Training of Convolutional Networks. *arXiv preprint arXiv:1708.03888*, 2017.
- [5] Jure Zbontar, Li Jing, Ishan Misra, Yann LeCun, and Stéphane Deny. Barlow Twins: Self-supervised Learning via Redundancy Reduction. In *International Conference on Machine Learning (ICML)*, pages 12310–12320, 2021.
